# Supplementary material for: Melt-quenched carboxylate metal–organic framework glasses
Source: PubMed Central journal article supplement (PMC10853212; doi:10.1038/s41467-024-45326-8), 2024-02-08
Supplement: 41467_2024_45326_MOESM1_ESM.pdf [file 41467_2024_45326_MOESM1_ESM.pdf]

Supplementary Information for

## Melt-quenched Carboxylate Metal-Organic Framework Glasses

*Min Hyuk Kim<sup>1</sup>, Hwa-Sub Lee<sup>2</sup>, Dong-Hyun Seo<sup>3</sup>, Sung June Cho<sup>\*4</sup>, Eun-chae Jeon<sup>\*2</sup>, and Hoi Ri Moon<sup>\*5</sup>*

*<sup>1</sup> Department of Chemistry, Ulsan National Institute of Science and Technology (UNIST), Ulsan 44919, Republic of Korea.*

*<sup>2</sup> School of Materials Science and Engineering, University of Ulsan, 93 Daehak-ro, Nam-gu, Ulsan 44610, Republic of Korea*

*<sup>3</sup>Major of Nano-Mechatronics, University of Science and Technology, 217, Gajeong-ro, Yuseong-gu, Daejeon 34113, Republic of Korea*

*<sup>4</sup>Department of Chemical Engineering, Chonnam National University, 77 Yongbong-Ro, Buk-gu, Gwangju 61186, Republic of Korea*

*<sup>5</sup>Department of Chemistry and Nano Science, Ewha Womans University, Seoul 03760, Republic of Korea*

*\*E-mail: sjcho@chonnam.ac.kr; jeonec@ulsan.ac.kr; hoirimoon@ewha.ac.kr*

## **Supplementary Notes 1. Synthesis of C-M-adp**

C-Mg-adp was synthesized as previously reported with some modifications.<sup>[1]</sup> Adipic acid ((HOOC)(CH<sub>2</sub>)<sub>4</sub>(COOH)) (0.053 g, 0.36 mmol) was dissolved in 4 mL of DMA and mixed with a solution of Mg(NO<sub>3</sub>)<sub>2</sub>·6H<sub>2</sub>O (0.084 g, 0.33 mmol) in 2 mL of MeOH. The mixed solution was sonicated for 10 min and then heated in a Teflon-lined vessel in an autoclave at 120 °C for 24 h before being cooled to room temperature. Colorless block-shaped crystals formed, which were filtered and briefly washed with the DMA than MeOH. The yield was 48 mg (41%). As-synthesized MOF was then dried overnight in a vacuum oven at 60 °C, resulting in crystals with less solvent but the identical structure, C-Mg-adp.

For the synthesis of C-Mn-adp, adipic acid (0.054 g, 0.37 mmol) was dissolved in 4 mL of DMA, and mixed with a solution of Mn(NO<sub>3</sub>)<sub>2</sub>·4H<sub>2</sub>O (0.072g, 0.29 mmol) in 1 mL of MeOH. The mixed solution was sonicated for 10 min and then heated in an aluminum seal-capped glass jar at 110 °C for 24 h before being cooled to room temperature, resulting in the formation of pale pink crystals.

Similarly, for C-Co-adp, adipic acid (0.050 g, 0.34 mmol) was dissolved in 4 mL of *N,N*-dimethylformamide (DMF), and mixed with a solution of CoCl<sub>2</sub>·6H<sub>2</sub>O (0.081g, 0.34 mmol) in 2 mL of EtOH. The mixed solution was sonicated for 10 min and then heated in an aluminum seal-capped glass jar at 100 °C for 24 h before being cooled to room temperature. This resulted in the formation of pink crystals and a purple polycrystalline solid formed.

For C-Tb-adp, adipic acid (0.058 g, 0.40 mmol) and Tb(NO<sub>3</sub>)<sub>3</sub>·5H<sub>2</sub>O (0.018g, 0.41 mmol) were dissolved in 5 mL of DMF. The solution was sonicated for 10 min and then heated in a Teflon-lined vessel in an autoclave at 100 °C for 24 h before being cooled to room temperature. Colorless crystals formed.

All C-M-adp compounds were filtered and briefly washed with their respective mother liquors, and then vacuum dried overnight at 60 °C.

## **Supplementary Notes 2. Thermal analyses of MOFs**

All thermal analyses (TGA, DSC) were performed under inert gas conditions, preventing oxidation during the heating process. The samples were prepared as a dried powder form, but some pore solvents remained in samples.

The TGA was performed at a ramp rate of  $10\text{ }^{\circ}\text{C min}^{-1}$  for determine the  $T_d$ , using a TGA Q50 from TA Instruments. TG-GC-MS analysis were performed at a ramp rate of  $10\text{ }^{\circ}\text{C min}^{-1}$ , using a TG209F1-GCMS from Netzsch.

The DSC were performed using a DSC Q200 from TA Instrument, for evaluated the  $T_m$  and  $T_g$  of C-Mg-adp and C-Mn-adp, also, DSC 4000 from PerkinElmer, for calculated the dynamic fragility ( $m$ ) of G-Mg-adp with various heating rate ( $10\text{--}40\text{ }^{\circ}\text{C min}^{-1}$ ) and measured the thermal behavior of C-M-adp MOFs ( $10\text{ }^{\circ}\text{C min}^{-1}$ ). The  $T_m$  and  $T_g$  of C-Mg-adp and C-Mn-adp referred to the onset temperature of the melting peak and the glass transition peak.

### **Supplementary Notes 3. Characterization of MOFs and MOF glasses**

XRPD data were collected on a Bruker D2 phaser diffractometer at 30 kV and 10 mA for Cu K $\alpha$  ( $\lambda = 1.54050\text{ \AA}$ ), with a step size of  $0.02^{\circ}$  in  $2\theta$ . In-situ variable temperature XRPD (VT-XRPD) were measured on a RIGAKU Smart Lab diffractometer for Cu K $\alpha$  under N $_2$  atmosphere.

Solution  $^1\text{H}$  Fourier-transform (FT) NMR experiments were carried out on a 400 MHz Bruker spectrometer, at the UNIST Central Research Facilities (UCRF) in Ulsan National Institute of Science and Technology (UNIST). All samples were prepared after digestion using deuterium chloride solution (35%, in D $_2$ O) and then dissolved in DMSO- $d_6$  solvent. Also, Infrared spectra were recorded with a ThermoFisher Scientific iS10 FT-IR spectrometer.

SEM images were obtained on a SU-7000 FE-SEM from Hitachi, at the UNIST UCRF. To decrease charging effects, the samples were sputtered with platinum prior to the measurement.

Total scattering data have been collected on a PANalytical B.V Empyrean X-ray diffractometer at 60 kV and 36 mA (3.6 kW) for Ag K $\alpha$  ( $\lambda = 0.559407\text{ \AA}$ ,  $Q\text{ max} \sim 22\text{ \AA}^{-1}$ ), with a step size of  $0.06^{\circ}$  in  $2\theta$  (scan range:  $2\text{--}148^{\circ}$ ) using GaliPIX3D detector. From these data, pair distribution functions (PDF) in the form  $G(r)$  have been calculated by PANalytical HighScore Plus. The PDF data represented the short-range order and long-range order correlation (up to at  $r \sim 99\text{ \AA}$ ) for all samples. Published structure for the mother structure of C-Mg-adp was used to create the simulated PDF data in PDFgui. A simulated partial PDF was also created in PDFgui, which represents the correlation between specific atoms in the structure.

The gas adsorption–desorption isotherms were measured at 77 K (H $_2$ , N $_2$ ) and 273K (CO $_2$ ) using liquid nitrogen and ice bath each, on a BELSORP-MAX. Prior to the adsorption measurement, the samples were evacuated at  $110\text{ }^{\circ}\text{C}$  under vacuum ( $p < 10^{-5}\text{ mbar}$ ) for overnight for C-Mg-adp and G-Mg-adp.

The XAFS data of Mn-adp were measured with the laboratory X-ray spectrometer QuantumLeap-H2000 from Sigray, operating at 30 kV and 300 W. To determine the atomic structure of Mn-adp, XAFS spectra obtained at Mn K edge were analyzed using the Athena and Artemis packages<sup>1,2</sup>. The raw data analysis followed standard procedures using the IFEFFIT software package. The spectra underwent calibration, averaging, pre-edge background subtraction, and post-edge normalization using the Athena program within the IFEFFIT software package. Fourier transformation of the  $k^3$ -weighted EXAFS oscillations,  $k^3\chi(k)$ , from  $k$  space to  $R$  space, was performed within a range of 3.0–11.0 Å<sup>-1</sup> to generate a radial distribution function. In the context of XAFS analysis, Wavelet transforms provide an extension to Fourier transforms by effectively separating waveform contributions in both time and frequency domains (or, in the case of XAFS,  $k$  and  $R$  domains)<sup>3,4</sup>. In the present work, the wavelet-based approach is employed to enhance the qualitative analysis of the coordination environment.

#### **Supplementary Notes 4. Simulation methods for MOFs**

In this study, initial calculations on prototypical metal-organic frameworks (MOFs) were performed using Density Functional Theory (DFT) with the Cambridge Sequential Total Energy Package (CASTEP) code (version 22.11).<sup>5,6</sup> The plane-wave ultrasoft pseudopotential method was employed, and the OTF exchange functional was used for the exchange and correlation functional, based on the Generalized Gradient Approximation (GGA) - Perdew-Burke-Ernzerhof scheme.<sup>5</sup> Å cutoff energy of 500.0 eV and a  $k$ -point grid of  $1 \times 1 \times 1$  were utilized to compute the total energy and bulk modulus of the MOFs.

Force Field (FF) simulations were conducted using the General Utility Lattice Program (GULP), version 6.0.<sup>7,8</sup> Molecular Dynamics (MD) simulations were performed in both NVT (constant number of particles, volume, and temperature) and NPT (constant number of particles, pressure, and temperature) ensembles using modified Nosé-Hoover dynamics<sup>9</sup> as well as the leapfrog Verlet integrator with a time step of 0.5 femtoseconds. The simulations were carried out under various temperature conditions with an external pressure set at 0.1 MPa.

The initial configurations for MD calculations were obtained from fully optimized geometries. Each MD trajectory consisted of a production run lasting 20 picoseconds preceded by an equilibration run of 1 picosecond. Production frames were stored at intervals of every 10 femtoseconds.

## Supplementary Figures

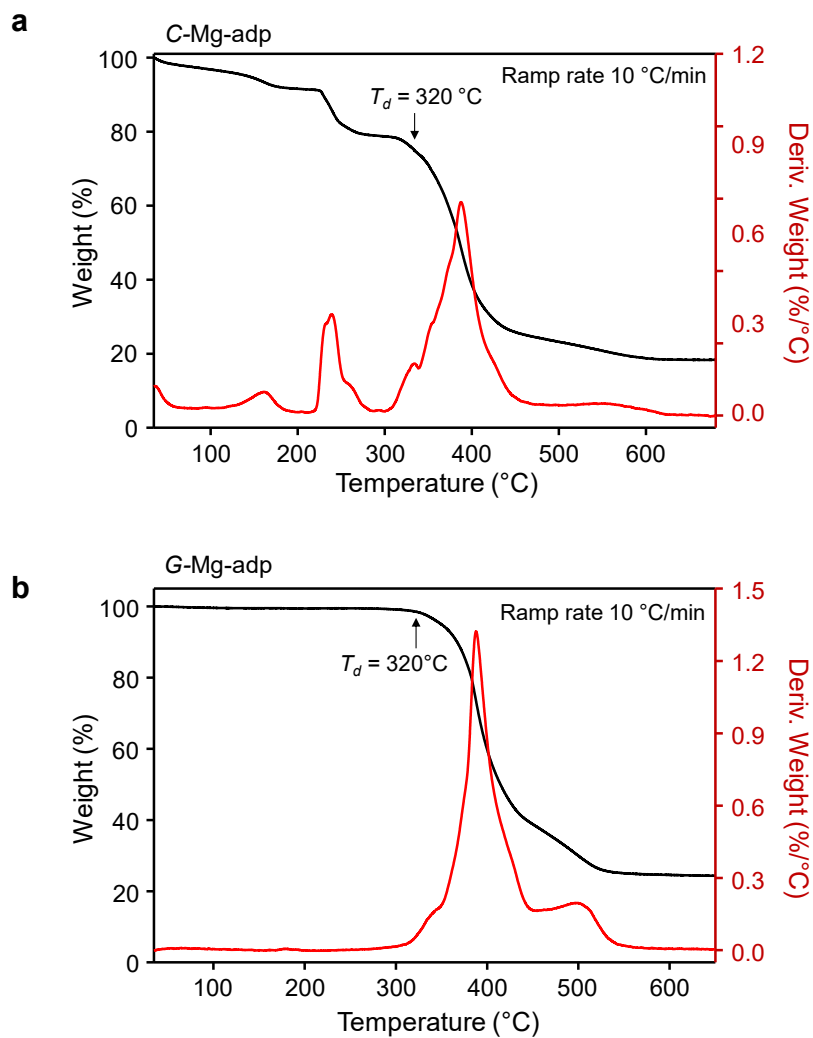

**Supplementary Fig. 1** TGA data of **a**, C-Mg-adp **b**, G-Mg-adp with 10 °C/min ramp rate.  $T_d$  was evaluated at 320 °C, which showed abrupt weight loss on TGA.

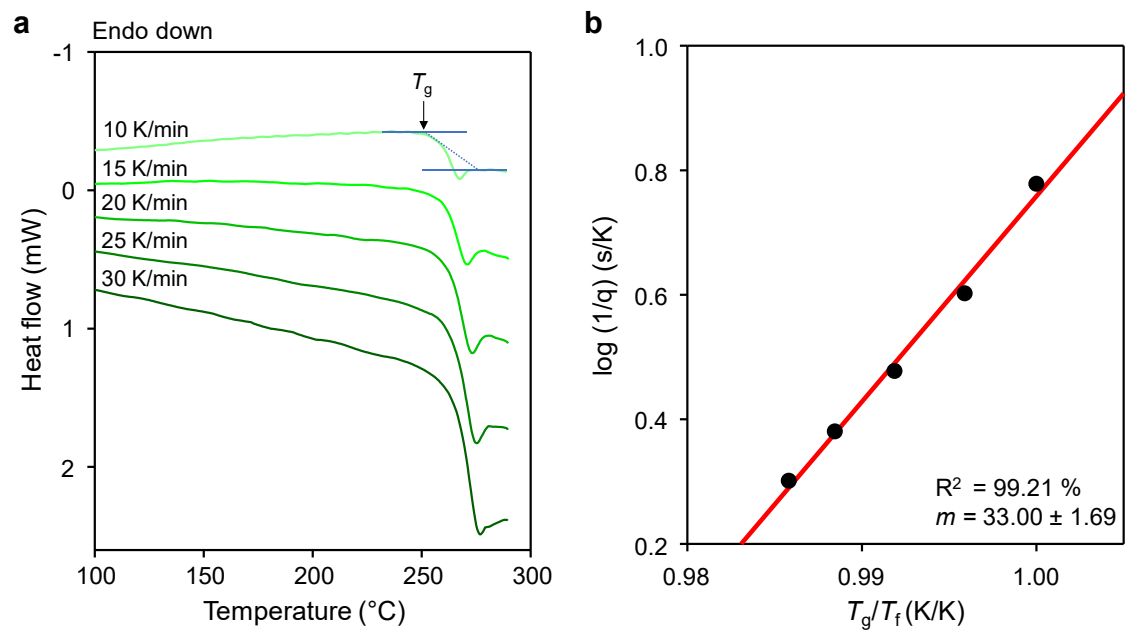

**Supplementary Fig. 2** The determination of liquid fragility index ( $m$ ) from DSC measurements of G-Mg-adp. **a**, DSC data using various heating rates. The calorimetric fictive temperature ( $T_f$ ) obtained using heating rate of 10 K/min is defined as  $T_g$  on  $\log(1/q)$  vs.  $T_g/T_f$  plot. **b**, Fragilities of G-Mg-adp, determined as the of  $\log(1/q)$  vs.  $T_g/T_f$  plot.

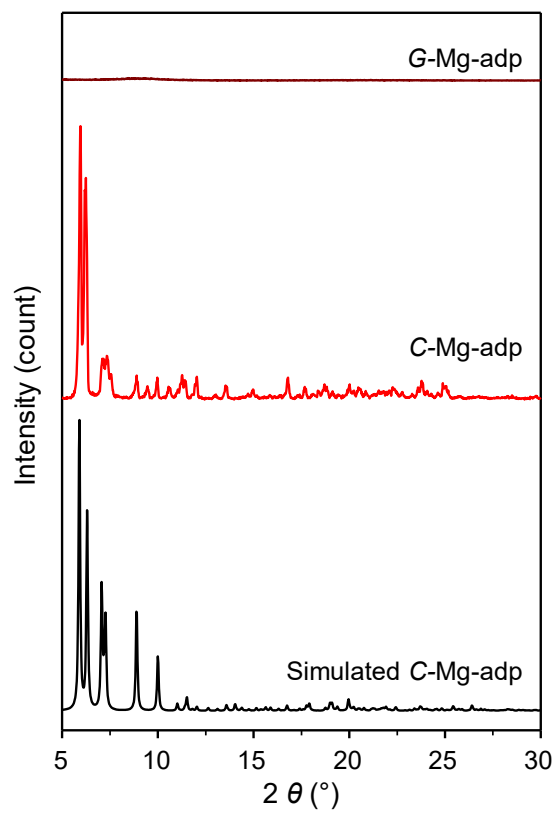

**Supplementary Fig. 3** XRPD data of C-Mg-adp (red) and G-Mg-adp (dark red) with simulated pattern of C-Mg-adp (black).

\* = Al<sub>2</sub>O<sub>3</sub> Holder peak

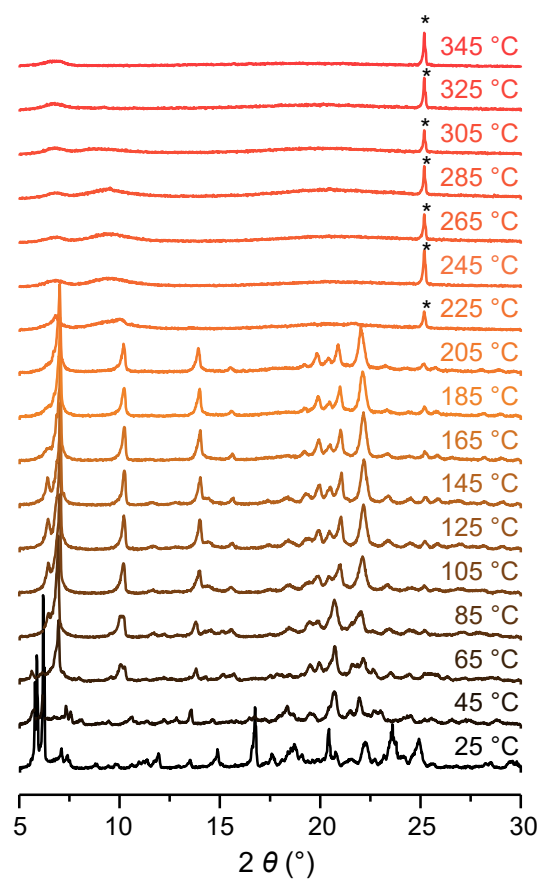

**Supplementary Fig. 4** VT-XRPD data of C-Mg-adv. The data was measured at 20 °C intervals within the temperature range of 25 – 345 °C in the N<sub>2</sub> inert gas atmosphere.



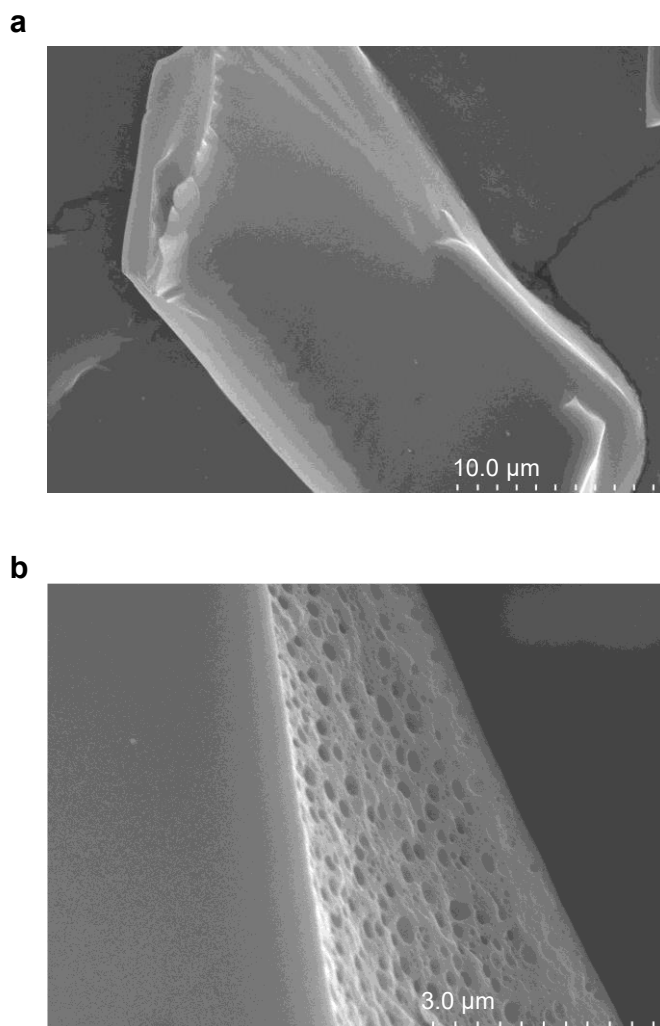

**Supplementary Fig. 5** SEM images of G-Mg-adp captured after heating C-Mg-adp to its melting point ( $T_m$ ) at 285 °C with a heating rate of 10 °C min<sup>-1</sup>. **a**, G-Mg-adp immediately cooled to room temperature once the temperature reached 285 °C. **b**, G-Mg-adp heated at 285 °C for 1 hour and then cooled to room temperature, resulting in the formation of large bubbles due to the evolution of CO gas and organic vesicles.

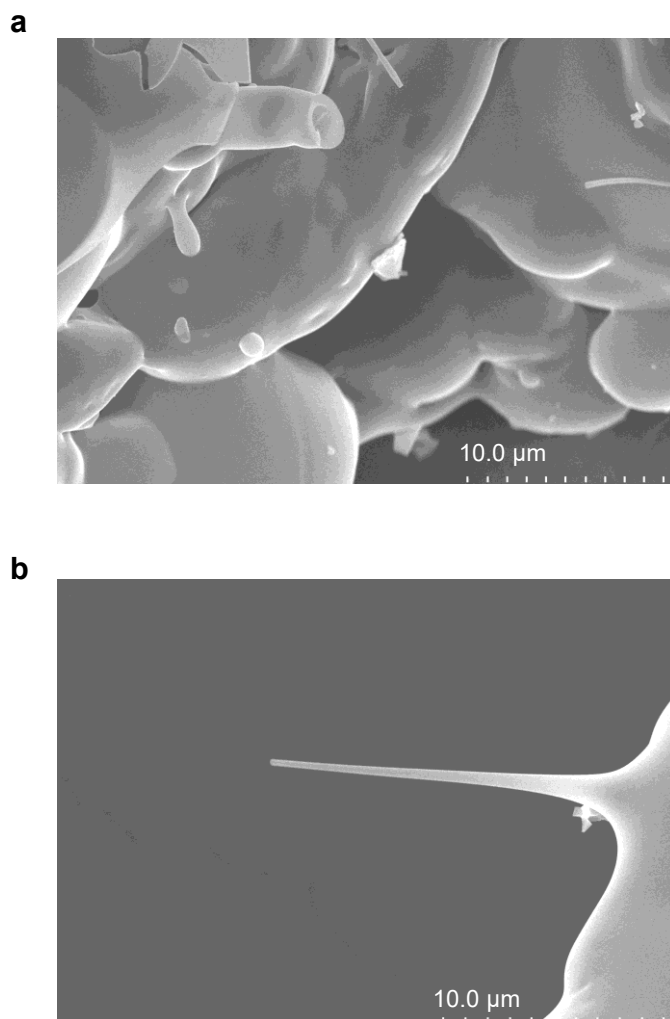

**Supplementary Fig. 6** SEM images of G-Mg-adp, obtained after quenching and subsequent annealing at 265 °C for 12 hours. **a**, Puffed and **b**, stalactite-like shapes are occurred from viscous fluid, suggesting a melted phase of Mg-adp.

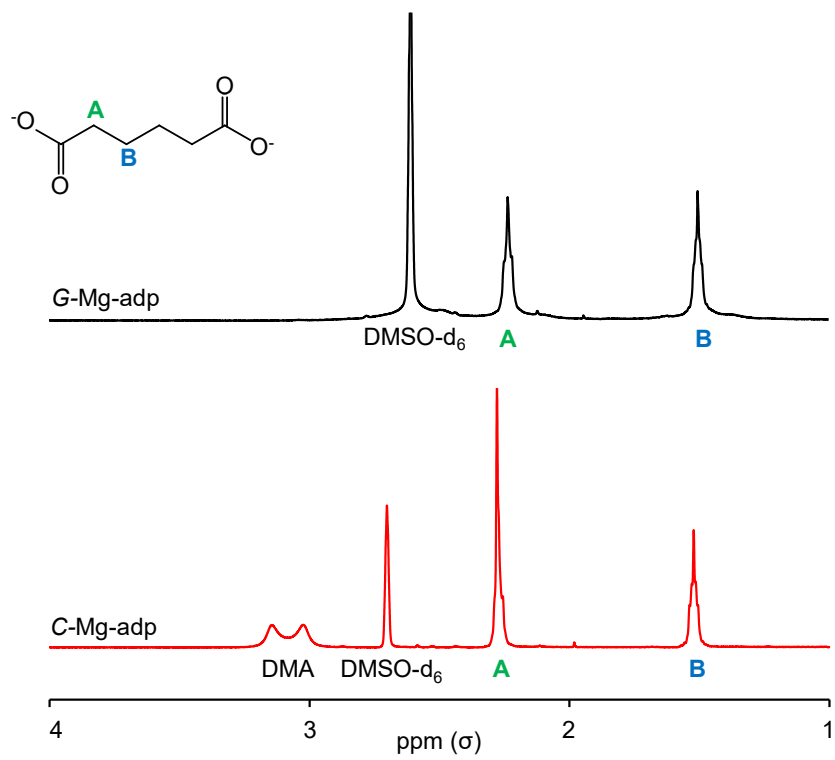

**Supplementary Fig. 7** <sup>1</sup>H NMR spectra for C-Mg-adp (red) and G-Mg-adp (black).

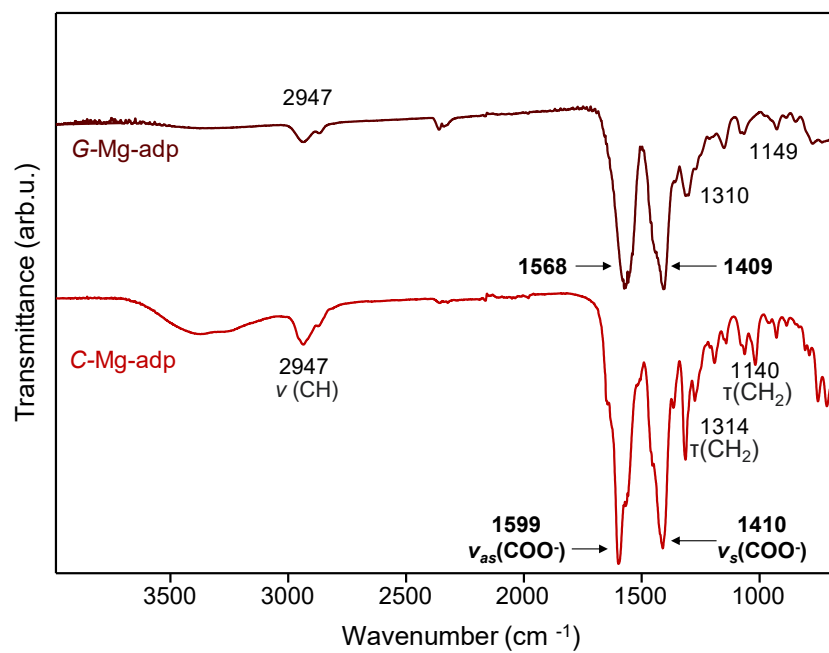

**Supplementary Fig. 8** FT-IR spectra of C-Mg-adp (red) and G-Mg-adp (black). Each term refers to a vibration mode within the adipate ligand.

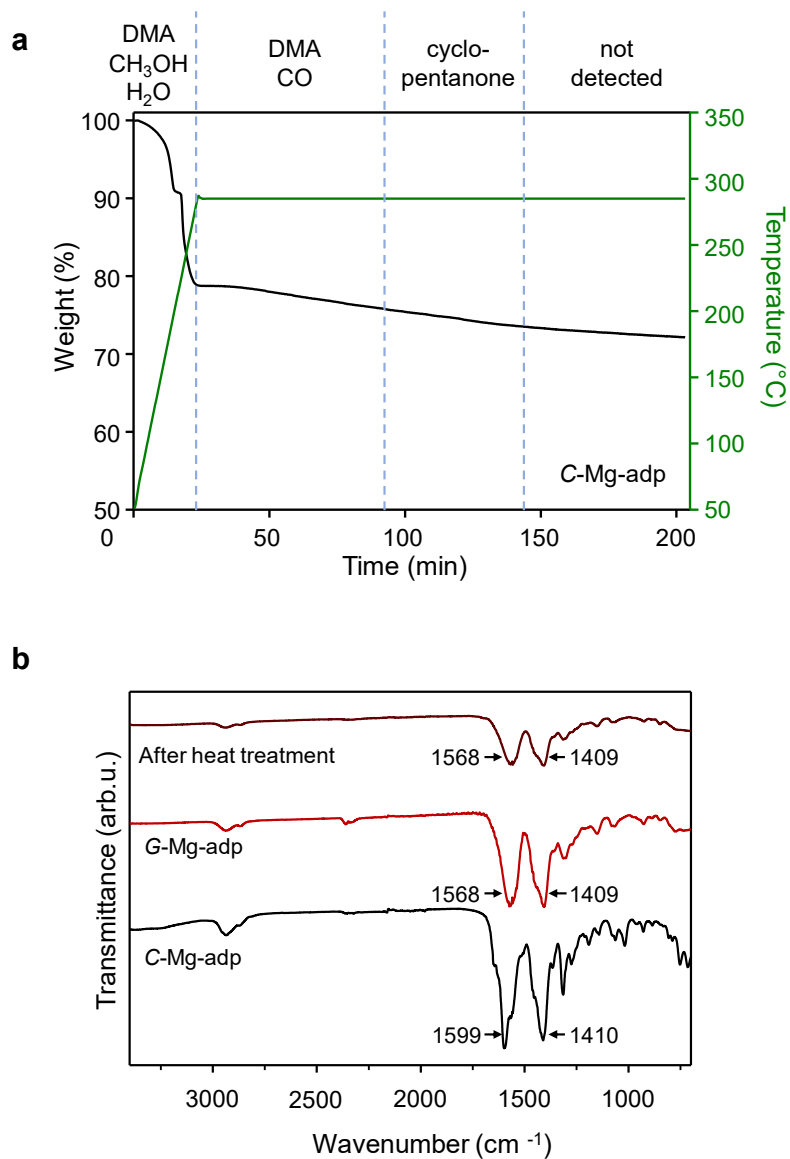

**Supplementary Fig. 9 a**, TG-GC-MS data collected for C-Mg-adp by heating up to 285 °C, followed by isothermal measurements for 3 h under an Ar atmosphere. The types of species detected for each range were represented at the top. **b**, The FT-IR data collected after the heat treatment of Mg-adp, compared with C-Mg-adp and G-Mg-adp.

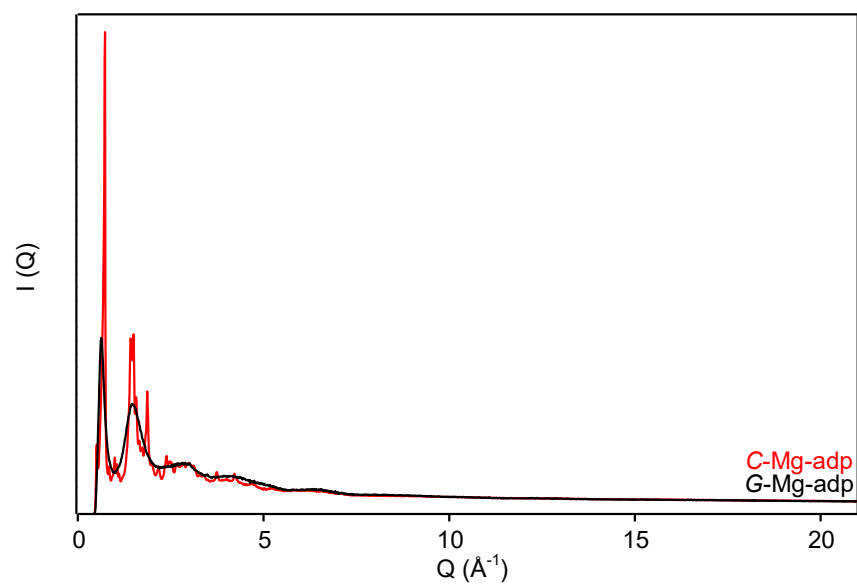

**Supplementary Fig. 10** Total scattering data of C-Mg-adp (red) and G-Mg-adp (black).

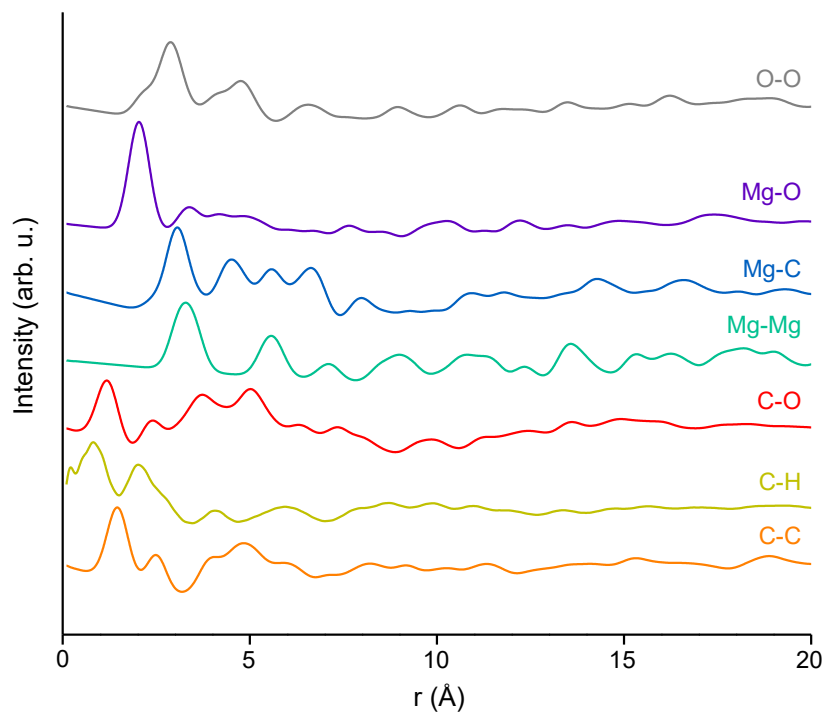

**Supplementary Fig. 11** Simulated partial pair distribution functions of C-Mg-adp with PDFgui. Each line represents only the correlation between specific atoms.

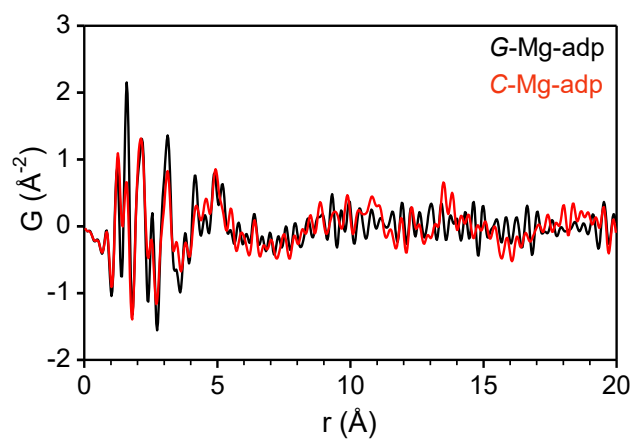

**Supplementary Fig. 12** Measured full pair distribution function data for C-Mg-adp and G-Mg-adp with short-, middle- and long-range correlations shown.



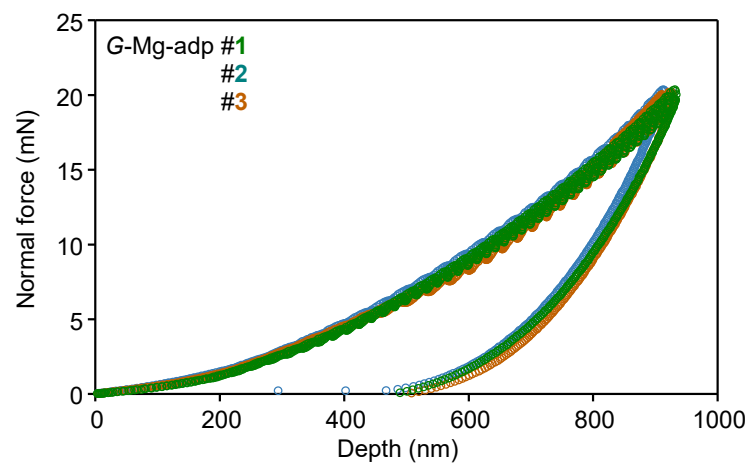

**Supplementary Fig. 13** Load-depth curves of G-Mg-adp obtained from nanoindentation tests.

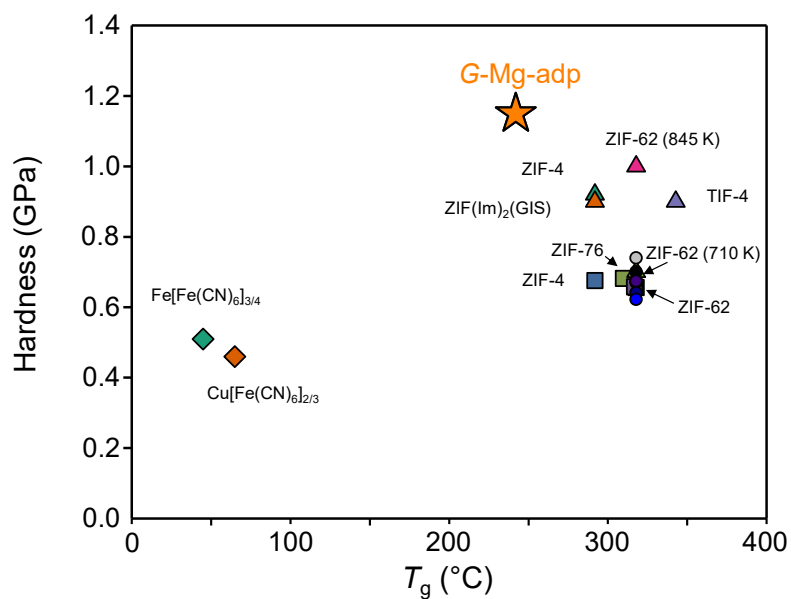

**Supplementary Fig. 14** Glass transition temperature-Hardness correlation chart for metal-organic coordination glasses. Note: The circle symbols represent the difference in values according to the change of preparation conditions and hardness test conditions in ZIF-62 glass.

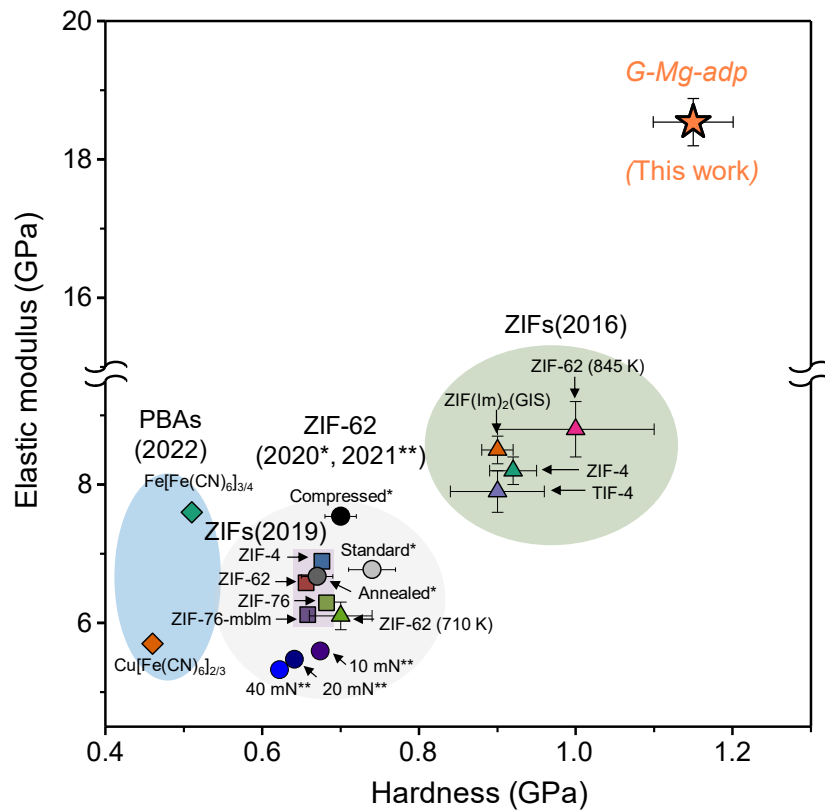

**Supplementary Fig. 15** Detail chart of Hardness-Modulus correlation to coordination polymer glasses. Crossed bars indicate the standard deviation for each value. The values in this chart were compiled from the references shown in **Supplementary Table 2**.

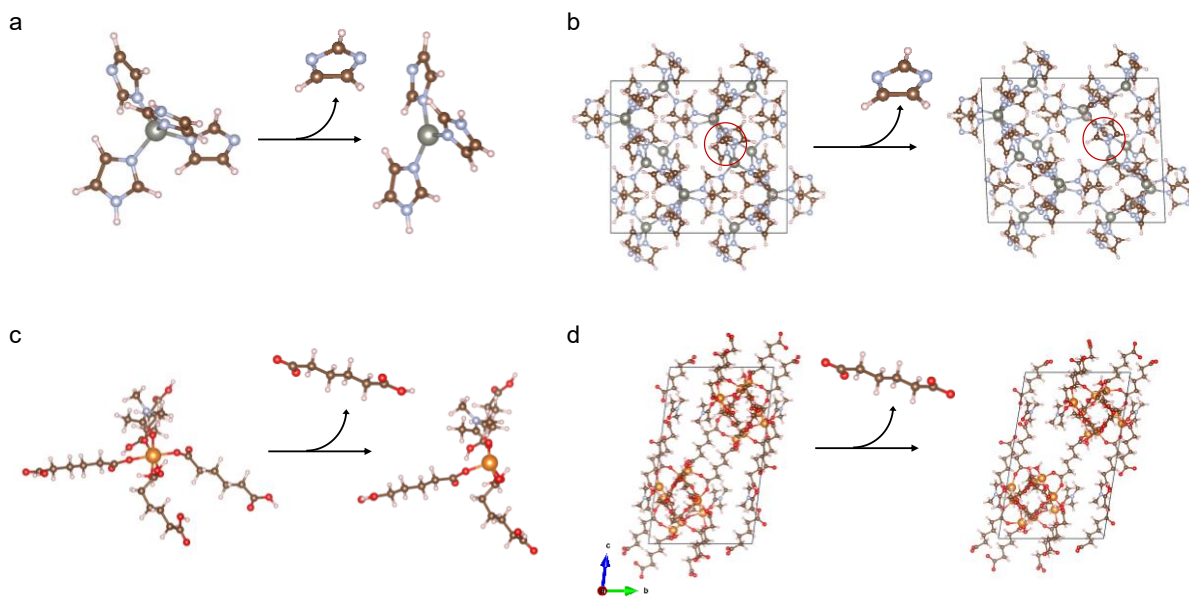

**Supplementary Fig. 16** Model construction by removing a ligand from the original structures. **a**, A cluster model and **b**, a crystal model of ZIF-4. **c**, A cluster model and **d**, a crystal model of C-Mg-adp.

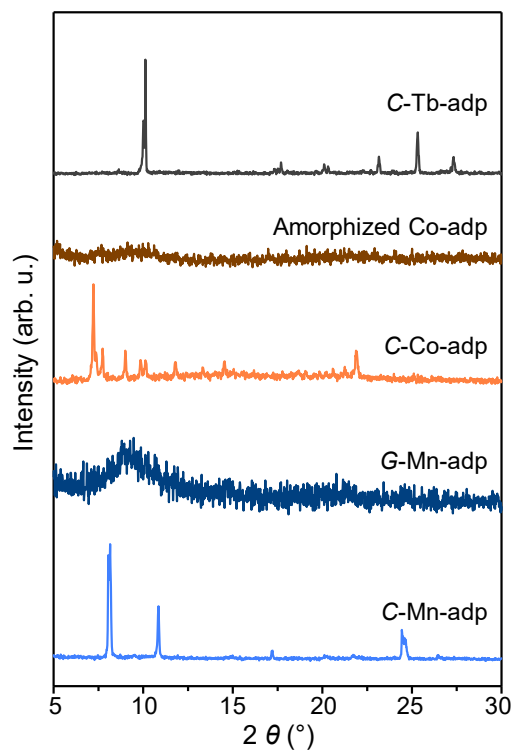

**Supplementary Fig. 17** XRPD data of C-M-adp ( $M = \text{Mn}^{2+}$ ,  $\text{Co}^{2+}$ ,  $\text{Tb}^{3+}$ ), G-Mn-adp and amorphized Co-adp. G-Mn-adp was yielded through the melt-quenching process of C-Mn-adp under inert gas atmosphere at  $240^{\circ}\text{C}$  for 10 min. The amorphization of C-Co-adp was conducted in the inert gas at  $200^{\circ}\text{C}$  for 10 min.

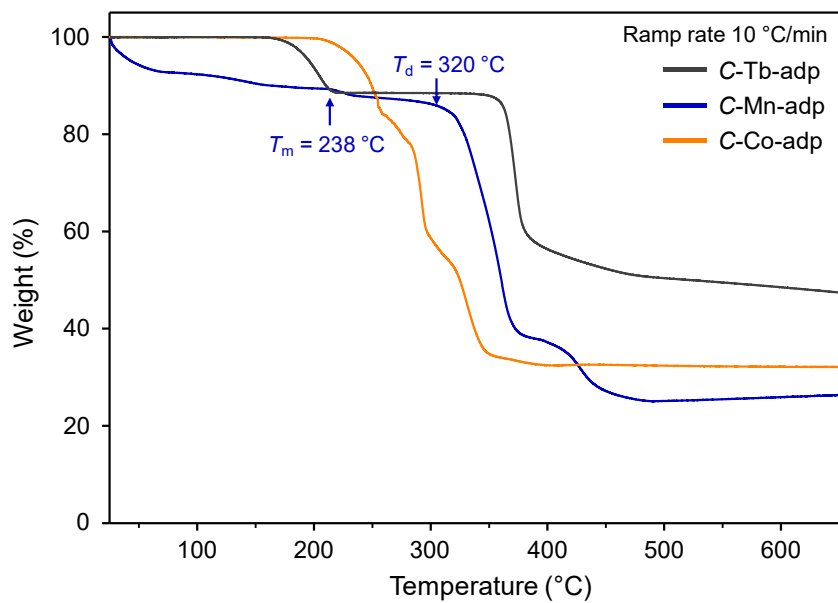

**Supplementary Fig. 18** TGA data of C-M-adp (M = Mn<sup>2+</sup>, Co<sup>2+</sup>, Tb<sup>3+</sup>).  $T_m$  and  $T_d$  of C-Mn-adp were indicate in the figure.

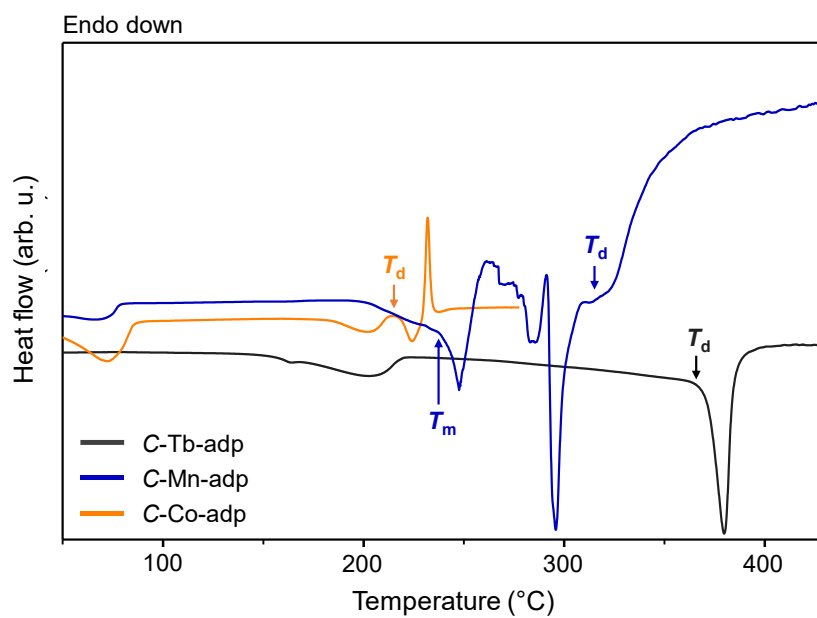

**Supplementary Fig. 19** The DSC curves of C-M-adp MOFs. C-Co-adp (orange), C-Tb-adp (black), and C-Mn-adp (blue).  $T_m$  of C-Mn-adp and  $T_d$  of each C-M-adp were indicated in the figure, respectively.

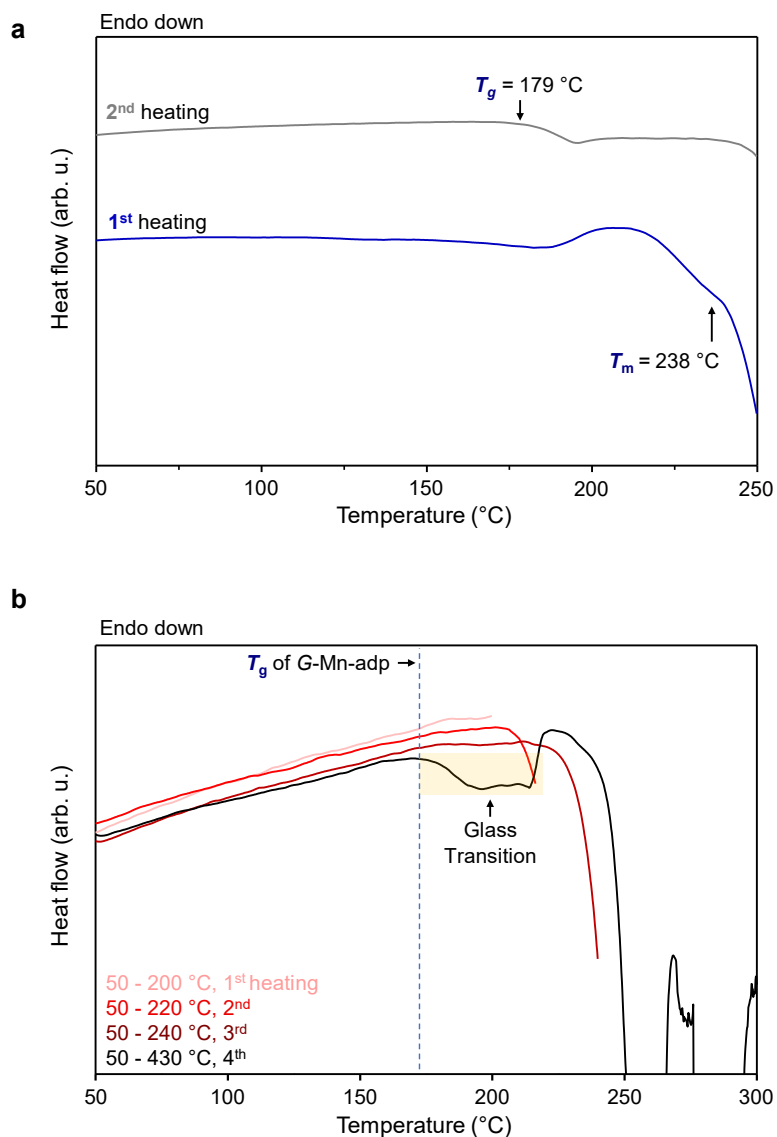

**Supplementary Fig. 20 a**, The DSC curves of C-Mn-adp depicts the heating, cooling, and subsequent reheating cycles. Both heating and cooling processes were carried out at a ramping rate of 10 °C/min, with the initial heating phase reaching 250 °C. **b**, Consecutive DSC runs with progressively higher maximum temperatures: 200°C, 220°C, 240°C, and 430°C. Upon reaching each specified maximum temperature, C-Mn-adp was maintained under isothermal conditions at that temperature for 5 minutes, followed by a cooling step. A glass transition of Mn-adp can be observed only after reaching at least 240°C, as indicated by the 4<sup>th</sup> curve at 430°C.



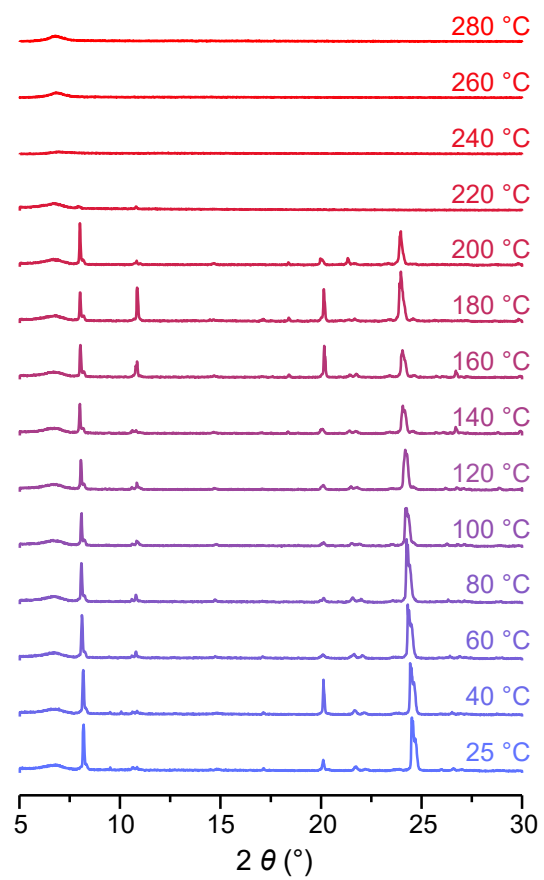

**Supplementary Fig. 21** VT-XRPD data of C-Mn-adp. The data was measured at 20 °C intervals within the temperature range of 25 – 280 °C in the N<sub>2</sub> inert gas atmosphere.

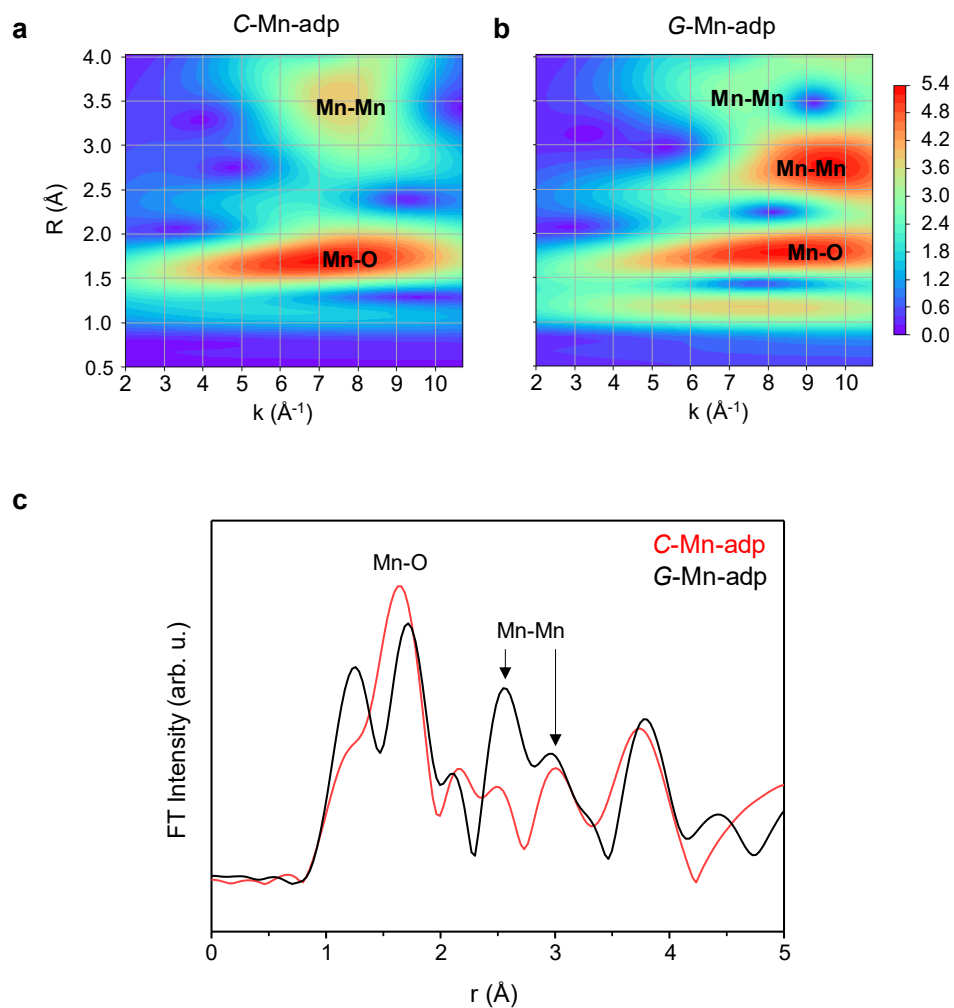

**Supplementary Fig. 22** The wavelet contour using Morlet method with  $\eta = 10$  and  $\sigma = 1$  over XAFS data of **a**, C-Mn-adp and **b**, G-Mn-adp. **c**, The Fourier-transforms of XAFS spectra as a function of radial distance for C-Mn-adp (red) and G-Mn-adp (black). Phase shift within the data set was uncorrected.

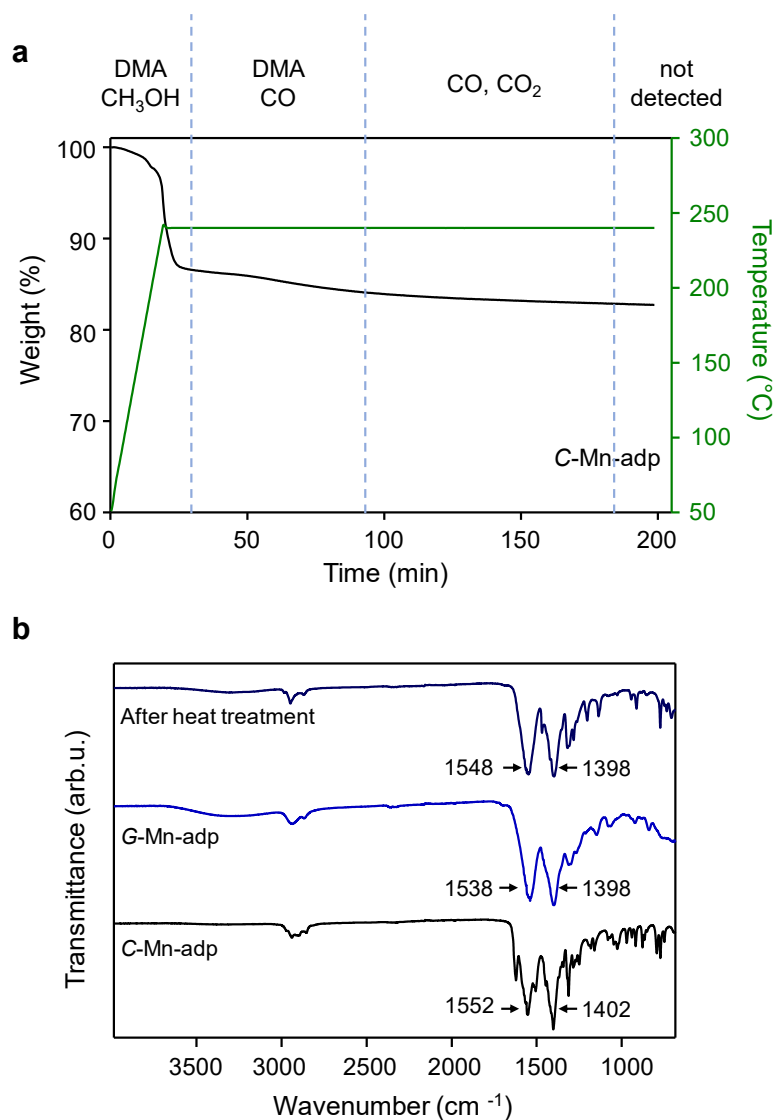

**Supplementary Fig. 23 a**, TG-GC-MS data were collected for C-Mn-adp by heating up to 240 °C, followed by isothermal measurements for 3 h under an Ar atmosphere. The types of species detected for each range were represented at the top. **b**, The FT-IR data collected after the heat treatment, compared with C-Mn-adp and G-Mn-adp.

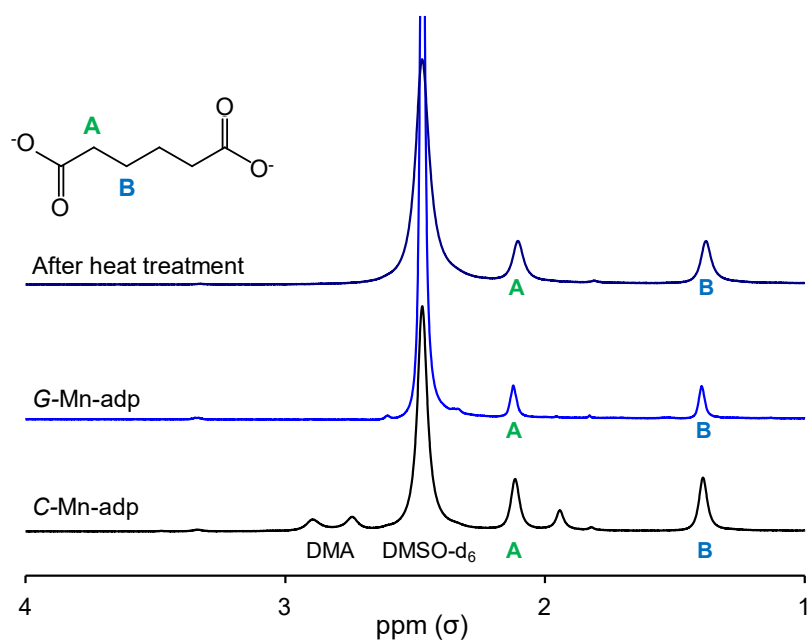

**Supplementary Fig. 24** <sup>1</sup>H NMR spectra for C-Mn-adp, G-Mn-adp and the sample after heat treatment at 285 °C for 3 h.

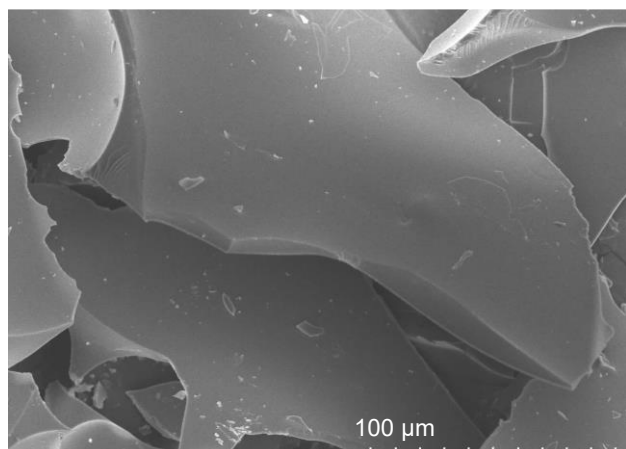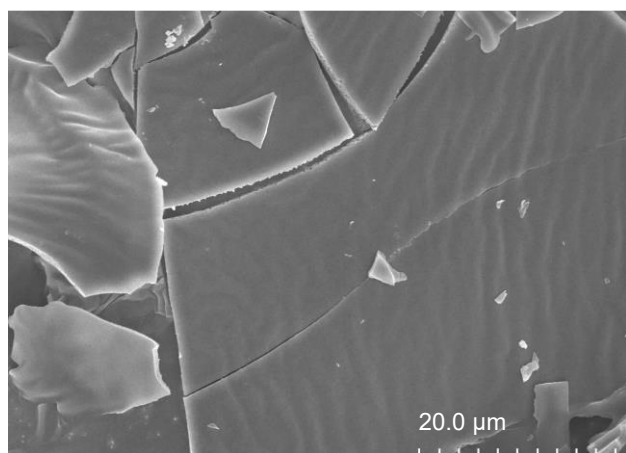

**Supplementary Fig. 25** SEM images of G-Mn-adp subjected to quenching immediately after reaching its  $T_m$ .

**a**

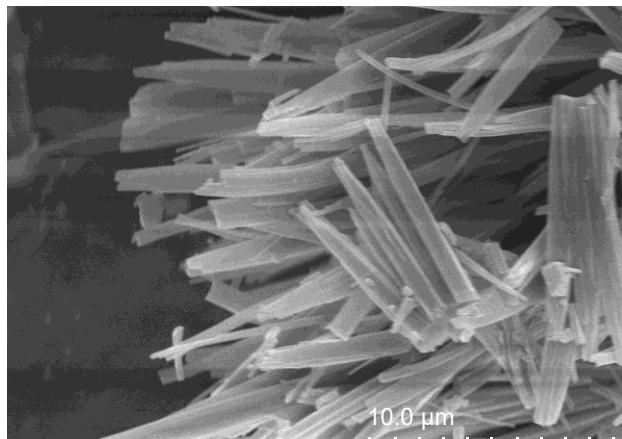

**b**

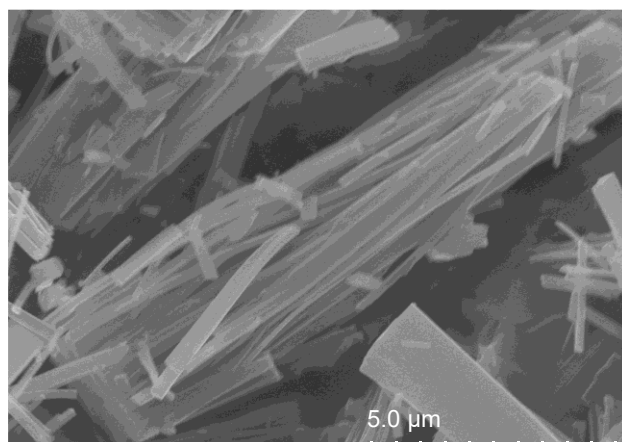

**Supplementary Fig. 26** SEM images of **a**, C-Co-adp and **b**, thermally amorphized phase, which was heated at 220 °C for 10 minutes.

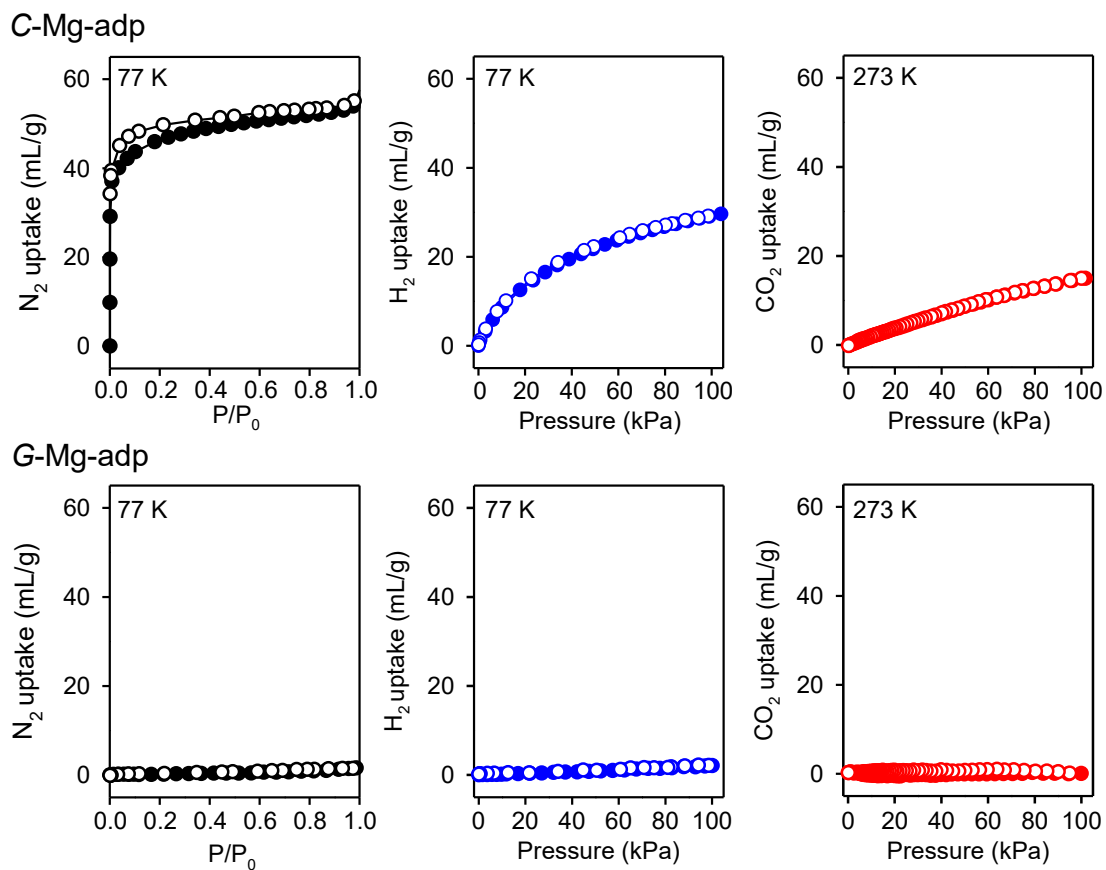

**Supplementary Fig. 27** Gas adsorption measurements of C-Mg-adp (top) and G-Mg-adp (bottom), isotherm data (Inset: isotherm temperature) for N<sub>2</sub> (left), H<sub>2</sub> (middle), and CO<sub>2</sub> (right), with filled and hollow circles represent adsorption and desorption points, respectively.

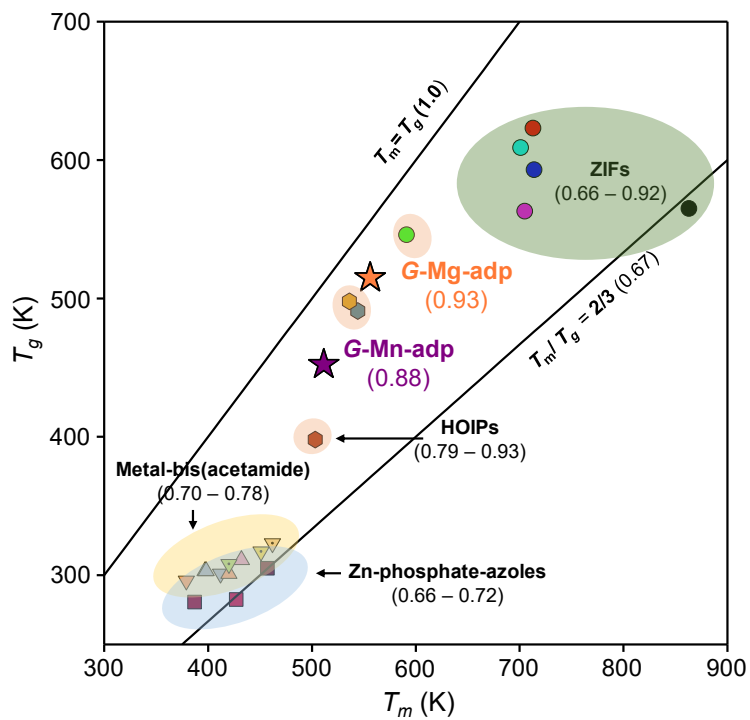

**Supplementary Fig. 28** The  $T_m$ – $T_g$  correlation chart displays the GFA of meltable coordination structures. Values in parentheses represent the  $T_m/T_g$  for each structure. The black lines denote the Kauzmann “2/3” law and the upper bound where  $T_g$  equals  $T_m$ .



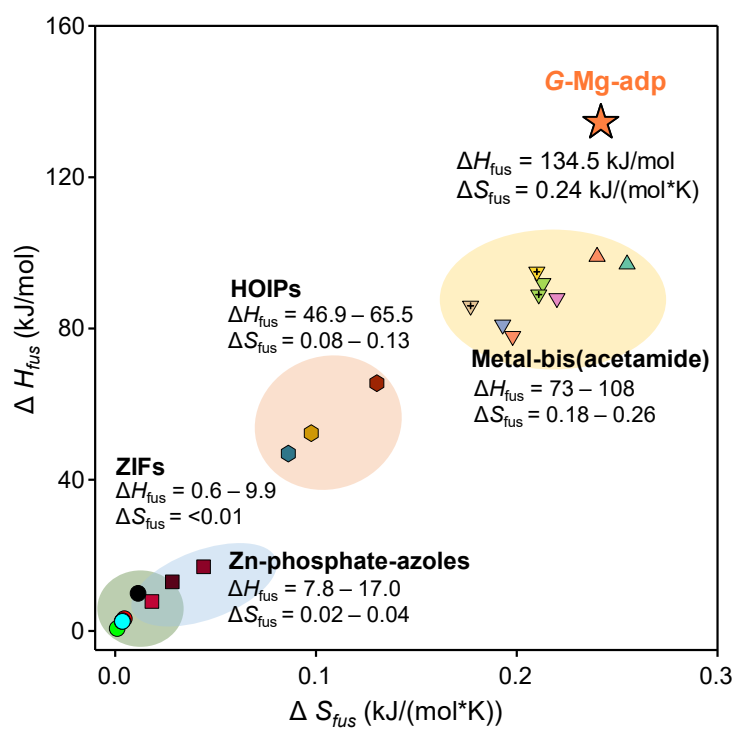

**Supplementary Fig. 29** The  $\Delta S_{fus}$  –  $\Delta H_{fus}$  correlation for meltable coordination structures.

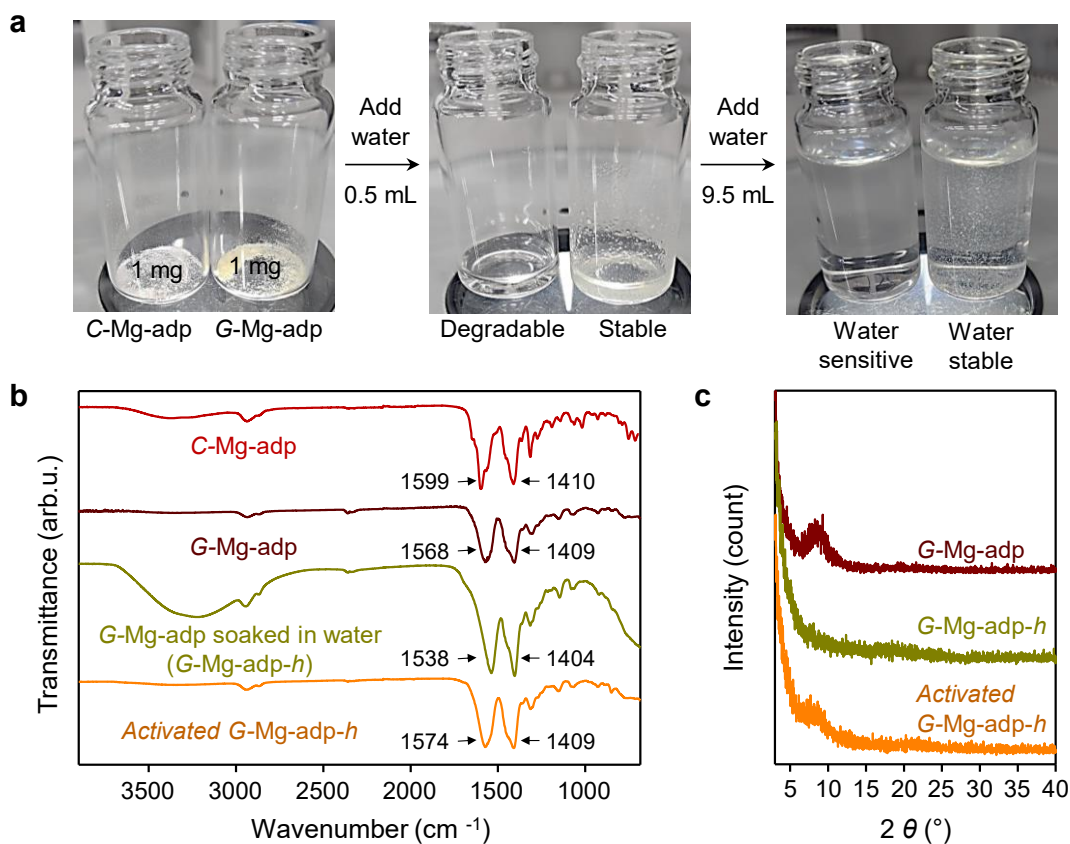

**Supplementary Fig. 30** Water stability test of C-Mg-adp and G-Mg-adp. **a**, Photographs for the water treatment processes for C-Mg-adp and G-Mg-adp powders. Notably, G-Mg-adp remains stable even in a large quantity of water, whereas C-Mg-adp undergoes degradation in a small amount of water. **b**, FT-IR data of C-Mg-adp, G-Mg-adp, G-Mg-adp-*h*, and activated G-Mg-adp-*h*. **c**, XRPD data of G-Mg-adp, G-Mg-adp-*h*, and activated G-Mg-adp-*h*.

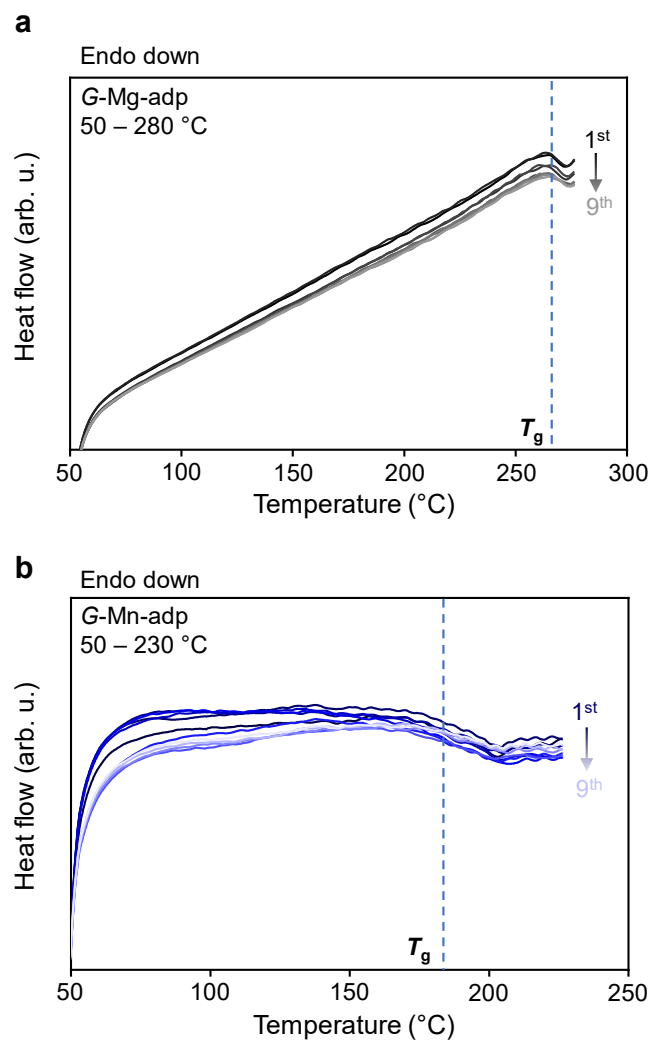

**Supplementary Fig. 31** DSC curves of **a**, G-Mg-adp and **b**, G-Mn-adp from nine consecutive heating and cooling cycles. Only the heating step data is displayed to highlight  $T_g$ . Measurements were conducted from 50 °C to slightly below each MOF's  $T_m$ , with a heating/cooling rate of 10 °C/min.

## Supplementary Tables

**Supplementary Table 1.** The elastic modulus, hardness, and physical derivatives for various glass materials are presented. The standard deviation is represented within parentheses, and when not mentioned in the reference, it is not indicated. Please refer to the attached references for each symbol to understand the physical meaning of the derivative.

| Sample                        | $H$ (GPa)              | $E$ (GPa)           | $H/E$<br>(arb. u.) <sup>[15]</sup> | $H^2/E$<br>(GPa) <sup>[16]</sup> | $H^3/E^2$<br>(GPa) <sup>[17]</sup> | $(E*H)^{1/2}$<br>(GPa) <sup>[18]</sup> | Ref.      |
|-------------------------------|------------------------|---------------------|------------------------------------|----------------------------------|------------------------------------|----------------------------------------|-----------|
| G-Mg-adp                      | 1.18                   | 18.29               | 0.065                              | 0.076                            | 0.0044                             | 4.617                                  | This work |
| ZIF-4                         | 0.92<br>( $\pm 0.03$ ) | 8.2 ( $\pm 0.2$ )   | 0.112                              | 0.103                            | 0.103                              | 2.746                                  | [19]      |
| ZIF(lm) <sub>2</sub><br>(GIS) | 0.9 ( $\pm 0.02$ )     | 8.5 ( $\pm 0.2$ )   | 0.106                              | 0.095                            | 0.0953                             | 2.765                                  | [19]      |
| TIF-4                         | 0.9 ( $\pm 0.06$ )     | 7.9 ( $\pm 0.3$ )   | 0.114                              | 0.0102                           | 0.103                              | 2.666                                  | [19]      |
| ZIF-62<br>(710 K)             | 0.7 ( $\pm 0.04$ )     | 6.1 ( $\pm 0.2$ )   | 0.115                              | 0.081                            | 0.0803                             | 2.066                                  | [19]      |
| ZIF-62<br>(845 K)             | 1 ( $\pm 0.1$ )        | 8.8 ( $\pm 0.4$ )   | 0.114                              | 0.114                            | 0.114                              | 2.966                                  | [19]      |
| ZIF-4                         | 0.676 ( $\pm 0.009$ )  | 6.89 ( $\pm 0.1$ )  | 0.0981                             | 0.066                            | 0.0663                             | 2.158                                  | [20]      |
| ZIF-62                        | 0.656 ( $\pm 0.005$ )  | 6.58 ( $\pm 0.02$ ) | 0.0997                             | 0.065                            | 0.0654                             | 2.077                                  | [20]      |
| ZIF-76                        | 0.682 ( $\pm 0.01$ )   | 6.29 ( $\pm 0.07$ ) | 0.108                              | 0.074                            | 0.0739                             | 2.071                                  | [20]      |
| ZIF-76-mblm                   | 0.658 ( $\pm 0.006$ )  | 6.12 ( $\pm 0.02$ ) | 0.108                              | 0.071                            | 0.0707                             | 2.006                                  | [20]      |
| ZIF-62<br>(compressed)        | 0.7 ( $\pm 0.02$ )     | 7.54 ( $\pm 0.03$ ) | 0.093                              | 0.065                            | 0.065                              | 2.297                                  | [21]      |

|                                       |                      |                    |       |        |        |       |      |
|---------------------------------------|----------------------|--------------------|-------|--------|--------|-------|------|
| ZIF-62<br>(annealed)                  | 0.67 ( $\pm$ 0.02)   | 6.67 ( $\pm$ 0.02) | 0.1   | 0.067  | 0.0673 | 2.114 | [21] |
| ZIF-62<br>(standard)                  | 0.74 ( $\pm$ 0.03)   | 6.77 ( $\pm$ 0.02) | 0.109 | 0.081  | 0.0809 | 2.238 | [21] |
| ZIF-62<br>(10 mN) <sup>a</sup>        | 0.674 ( $\pm$ 0.007) | 5.59 ( $\pm$ 0.02) | 0.121 | 0.081  | 0.0813 | 1.941 | [22] |
| ZIF-62<br>(20 mN) <sup>a</sup>        | 0.641 ( $\pm$ 0.006) | 5.47 ( $\pm$ 0.02) | 0.117 | 0.075  | 0.0751 | 1.873 | [22] |
| ZIF-62<br>(40 mN) <sup>a</sup>        | 0.622 ( $\pm$ 0.005) | 5.32 ( $\pm$ 0.02) | 0.117 | 0.073  | 0.0727 | 1.819 | [22] |
| Fe[Fe] <sub>3/4</sub> -g <sup>b</sup> | 0.51                 | 7.6                | 0.067 | 0.034  | 0.0342 | 1.969 | [23] |
| Cu[Fe] <sub>2/3</sub> -g <sup>b</sup> | 0.46                 | 5.7                | 0.081 | 0.037  | 0.0371 | 1.619 | [23] |
| Adipic acid<br>(100)                  | -                    | 11.53( $\pm$ 0.49) | -     | -      | -      |       | [24] |
| Adipic acid<br>(110)                  | 0.3                  | 10.39              | 0.029 | 0.0087 | 0.0087 | 1.766 | [25] |

<sup>a</sup> Max load on nanoindentation test

<sup>b</sup> Vickers hardness

**Supplementary Table 2.** Mechanical properties of G-Mg-adp evaluated by nanoindentation tests.

Values in parentheses represent standard deviations. Maximum load is 20 mN.  $W_x$  values which mean the absorbed energy during deformation were calculated by integrating the load-depth graph in **Supplementary Fig. 12**.  $W_{total}$  and  $W_{elastic}$  were the area of a loading curve and an unloading curve, respectively.  $W_{plastic}$  was a difference of  $W_{total}$  and  $W_{elastic}$ . Numbers in parentheses are standard deviations for three experiments.

|                                   |                                |
|-----------------------------------|--------------------------------|
| $W_{total}$ (J)                   | $64.40 (\pm 0.1507) *10^{-10}$ |
| $W_{elastic}$ (J)                 | $28.39 (\pm 0.9339) *10^{-10}$ |
| $W_{plastic}$ (J)                 | $36.00 (\pm 0.8595) *10^{-10}$ |
| $W_{elastic}/W_{total}$ (arb. u.) | $0.441(\pm 0.014)$             |
| Hardness ( $H$ ) (GPa)            | $1.18 (\pm 0.051)$             |
| Elastic modulus ( $E$ ) (GPa)     | $18.29 (\pm 0.342)$            |
| $H/E$ (arb. u.)                   | $0.065 (\pm 0.004)$            |
| $H^2/E$ (GPa)                     | $0.076 (\pm 0.008)$            |

**Supplementary Table 3.** Stabilization energy for metal-ligand formation of ZIF-4 and Mg-adp.

| Sample | $\Delta E$ (kcal mol <sup>-1</sup> ) <sup>a</sup> |               |
|--------|---------------------------------------------------|---------------|
|        | Cluster model                                     | Crystal model |
| ZIF-4  | -35.4                                             | -65.3         |
| Mg-adp | -39.0                                             | -113.8        |

<sup>a</sup>  $\Delta E$  can be obtained following the equation:  $\Delta E = E_{tot} - (E_{MOF^+} + E_{L^-})$

**Supplementary Table 4.** Lattice parameters for the initial, optimized and defect crystal structure.

|        |                        | a (Å)   | b (Å)   | c (Å)   | $\alpha$ (°) | $\beta$ (°) | $\gamma$ (°) | Bulk Modulus (GPa)          |
|--------|------------------------|---------|---------|---------|--------------|-------------|--------------|-----------------------------|
| ZIF-4  | Initial                | 15.3073 | 18.4260 | 15.3950 | 90.00        | 90.00       | 90.00        | -                           |
|        | Optimized <sup>a</sup> | 15.4423 | 18.4164 | 15.8302 | 90.00        | 90.00       | 90.00        | 29.9                        |
|        | Optimized <sup>b</sup> | 13.8823 | 17.8336 | 15.3667 | 90.00        | 90.00       | 90.00        | 0.86/1.44/1.15 <sup>c</sup> |
|        | Defect <sup>d</sup>    | 13.9267 | 18.5674 | 15.1760 | 92.83        | 89.01       | 90.37        | 3.45/1.22/2.33 <sup>c</sup> |
| Mg-adp | Initial                | 13.4950 | 19.0163 | 25.9664 | 81.04        | 74.94       | 69.22        | -                           |
|        | Optimized <sup>a</sup> | 13.4990 | 18.8970 | 26.0070 | 80.14        | 74.93       | 69.07        | 13.2                        |
|        | Optimized <sup>b</sup> | 14.2987 | 16.2385 | 26.3646 | 76.61        | 72.63       | 64.90        | 0.28/4.07/2.17 <sup>c</sup> |
|        | Defect <sup>d</sup>    | 14.7082 | 16.8661 | 25.5742 | 74.02        | 71.49       | 64.15        | - <sup>e</sup>              |

<sup>a</sup> The structure has been optimized readily using CASTEP program with OTF potential.

<sup>b</sup> The reactive force field has been utilized during the optimization employing *NPT* condition at 300 K with the General Utility Lattice Program.

<sup>c</sup> The bulk modulus (Reuss/Voigt/Hill conventions) contains information regarding the hardness of a material with respect to various types of deformation which are available from the GULP calculation.

<sup>d</sup> The structure has been optimized under the condition that charge in a periodic cell was neutralized with a background and the charge was obtained using iterative algorithms rather than matrix diagonalization.

<sup>e</sup> The defect structure is likely to be fragile because of the defect induced by the deletion of adp ligand and resulted in the negative bulk modulus.



**Supplementary Table 5.** Metal-ligand ratio of C- and G-Mg-adp calculated from TGA data. The weight of each sample at 300 °C is set as 100 wt% because all guests have been removed. These datasets in the figure below are identical to those in Supplementary Fig. 1.

|          | MgO wt% <sup>a</sup> | adp - O wt% <sup>b</sup> | Mg mol%/g <sup>c</sup> | adp mol%/g <sup>d</sup> | Mg:adp Ratio |
|----------|----------------------|--------------------------|------------------------|-------------------------|--------------|
| G-Mg-adp | 24.5 %               | 75.5 %                   | 0.608 %                | 0.589 %                 | 1:0.969      |
| C-Mg-adp | 23.3 %               | 76.7 %                   | 0.578 %                | 0.599 %                 | 1:1.036      |

<sup>a</sup> Remaining weight of the samples heated up to 700 °C

<sup>b</sup> Loss in weight of the samples heated up to 700 °C

<sup>c</sup> Calculated from MgO wt% using the MW of MgO (40.3 g/mol).

<sup>d</sup> Calculated from Adp - O wt% using the MW of adipic acid excluding H<sub>2</sub>O (128.1 g/mol).

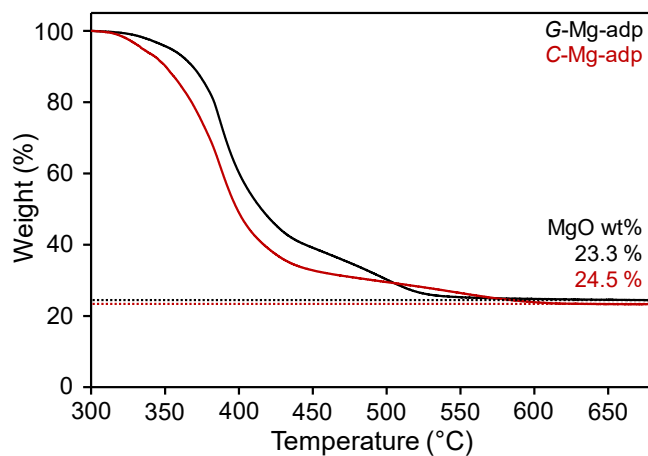

## Supplementary References

- [1] Ravel, B.; Newville, M. *J. Synchrotron Rad.* 2005, **12**, 537-541.
- [2] Newville M. Larch *J. Phys.: Conf. Ser.* 2013, **430**, 012007.
- [3] Funke, H.; Scheinost, A. C.; Chukalina, M. *Phys. Rev. B* 2005, **71**, 094110.
- [4] Muñoz, M.; Argoul, P.; Farges, F. Continuous Cauchy wavelet transform of XAFS spectra. *Physica Scripta*. IOP Publishing, 2005.
- [5] Clark, S. J.; Segall, M. D.; Pickard, C. J.; Hasnip, P. J.; Probert, M. J.; Refson, K.; Payne, M. *C. Z. fur Krist. – Cryst. Mater* 2005, **220**(5-6), 567-570.
- [6] Ruiz, V. G.; Liu, W.; Zojer, E.; Scheffler, M.; Tkatchenko, A. *Phys. Rev. Lett.* 2012, 108, 146103.
- [7] Gale, J. D. *JCS Faraday Trans.* 1997, **93**, 629.
- [8] Cope, E. R.; Dove, M. T. *J. Appl. Cryst.* 2007, **40**, 589-594.
- [9] Melchionna, S.; Ciccotti, G.; Holian, B. L. *Hoover Mol. Phys.* 1993, **78**, 533–544.
- [10] Farrow, C. L.; Juhas, P.; Liu, J. W.; Bryndin, D.; Božin, E. S.; Bloch, J.; Proffen, T.; Billinge, *J. Phy. Condens. Matter*, 2007, **19**, 335219.
- [11] Degen, T.; Sadki, M.; Bron, E.; König, U.; Nénert, G. *Powder Diffr.*, 2014, **29**, S13–S18.
- [12] To, T.; Sørensen, S. S.; Stepniewska, M.; Qiao, A.; Jensen, L. R.; Bauchy, M.; Yue, Y.; Smedskjaer, *Nat. Commun.*, 2020, **11**, 2593.
- [13] Zheng, Q.; Mauro, J. C.; Yue, Y. *J. Non. Cryst. Solids.*, 2017, **456**, 95-100.
- [14] Qiao, A.; Bennet, T. D.; Tao, H.; Krajnc, A.; Mali, G.; Doherty, C. M.; Thornton, A. W.; Mauro, J. C.; Greaves, G. N.; Yue, Y. *Sci. Adv.*, 2018, **4**, eaao6827.
- [15] (a) Finkin, E. Examination of abrasion resistance criteria for some ductile metals. 1974;  
(b) L.O. Affonso. Machinery Failure Analysis Handbook – Sustain Your Operations and Maximize Uptime. Gulf Publishing Company, USA, 2006.
- [16] Oyen, M. L.; Cook, R. F. *J. Mech. Behav. Biomed. Mater.* Elsevier BV, 2009.
- [17] Tsui T.Y.; Pharr G.M.; Oliver, W.C.; Bhatia C.S.; White R.L.; Anders A., Brown I.G. *MRS Proceedings*, 1994, **356**, 767.

- [18] (a) Karothu, D. P.; Mahmoud Halabi, J.; Ahmed, E.; Ferreira, R.; Spackman, P. R.; Spackman, M. A.; Naumov, P. *Angew. Chem. Int. Ed.*, 2022, **134**(10), e202113988.  
(b) Labonte, D.; Lenz, A. K.; Oyen, M. L. *Acta biomaterialia*, 2017, **57**, 373-383.
- [19] Bennett, T. D.; Yue, Y.; Li, P.; Qiao, A.; Tao, H.; Greaves, N. G.; Richards, T.; Lampronti, G. I.; Redfern, S. A.; Blanc, F. d. r. *J. Am. Chem. Soc.* 2016, **138** (10), 3484-3492.
- [20] Li, S.; Limbach, R.; Longley, L.; Shirzadi, A. A.; Walmsley, J. C.; Johnstone, D. N.; ... & Bennett, T. D. *J. Am. Chem. Soc.* , 2019, **141**(2), 1027-1034.
- [21] Qiao, A.; To, T.; Stepniewska, M.; Tao, H.; Calvez, L.; Zhang, X.; ... Yue, Y. *Phys. Chem. Chem. Phys.*, 2021, **23**, 16923-16931.
- [22] Stepniewska, M.; Januchta, K.; Zhou, C.; Qiao, A.; Smedskjaer, M. M.; Yue, Y. *Pros. Natl. Acad. Sci. U.S.A.*, 2020, **117**(19), 10149-10154.
- [23] Ma, N.; Ohtani, R.; Le, H. M.; Sørensen, S. S.; Ishikawa, R.; Kawata, S.; ...Horike, S. *Nat. Commun.*, 2022, **13**(1), 4023.
- [24] Mishra, M. K.; Ramamurty, U.; Desiraju, G. R. *Chem. Asian J.* 2015, **10** (10), 2176-2181.
- [25] Mishra, M. K.; Varughese, S.; Ramamurty, U.; Desiraju, G. R. *J. Am. Chem. Soc.* 2013, **135** (22), 8121-8124.
- [26] Degen, T.; Sadki, M.; Bron, E.; König, U.; Nénert, G. *Powder Diffr.* 2014, **29** (S2), S13-S18.
